# Supplementary material
Source: Springer Nature journal article supplement (https://www.springermedizin.de/resource/supplementary/12958_2003_107_MOESM4_ESM.pdf/9566134)

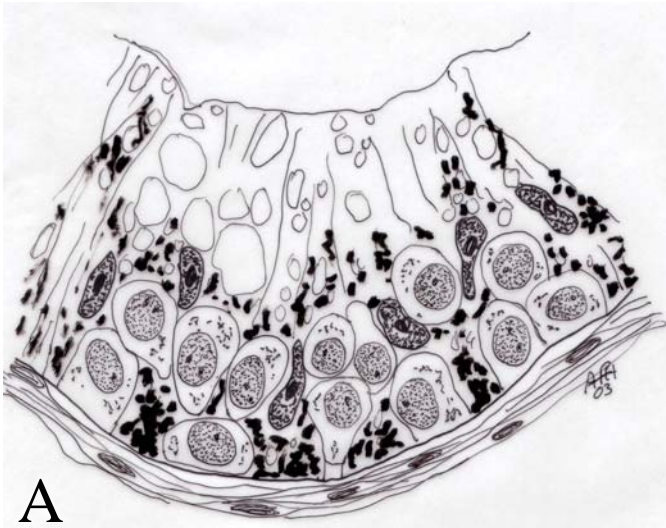

A

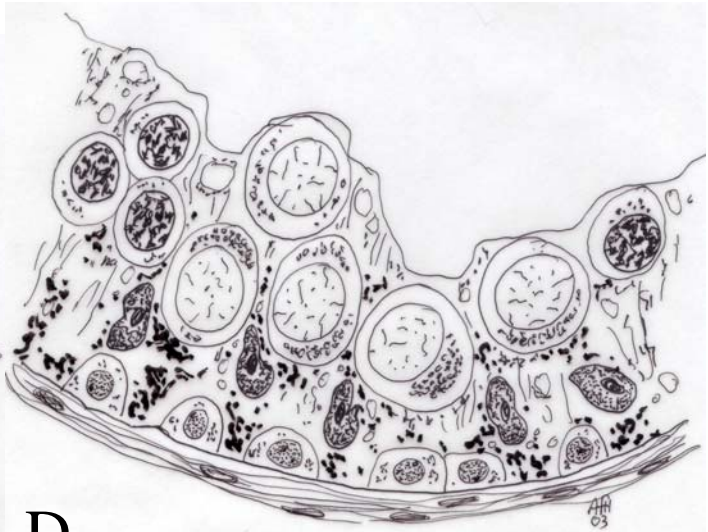

D

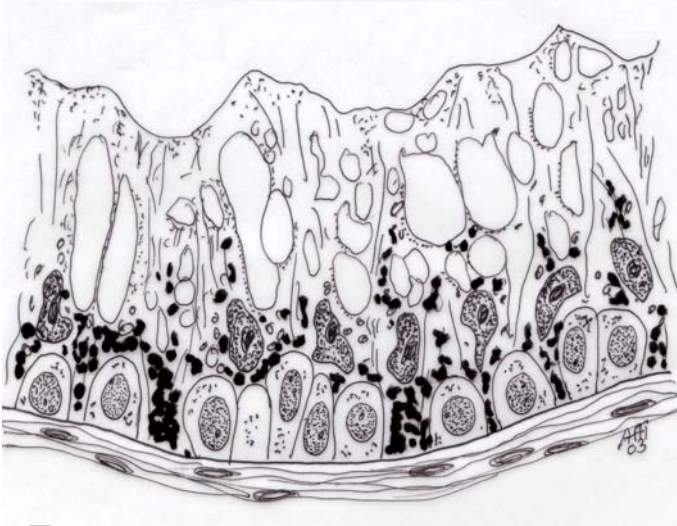

B

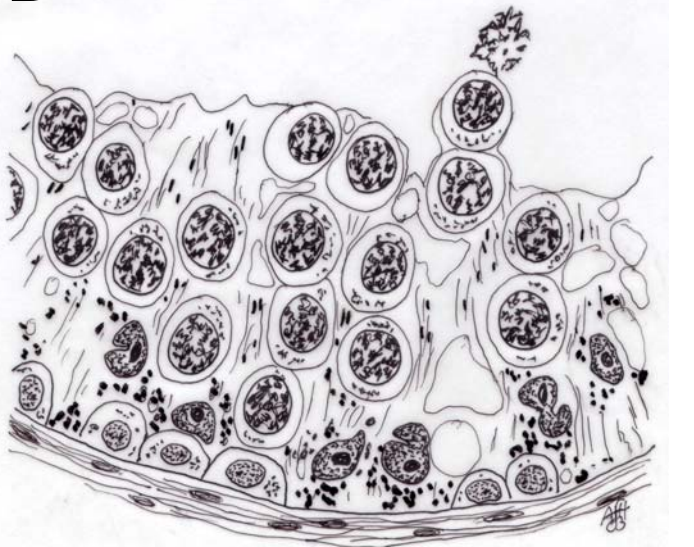

E

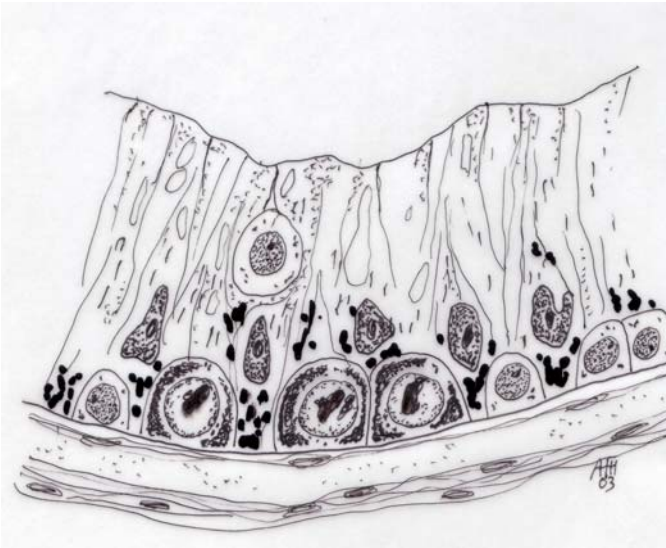

C

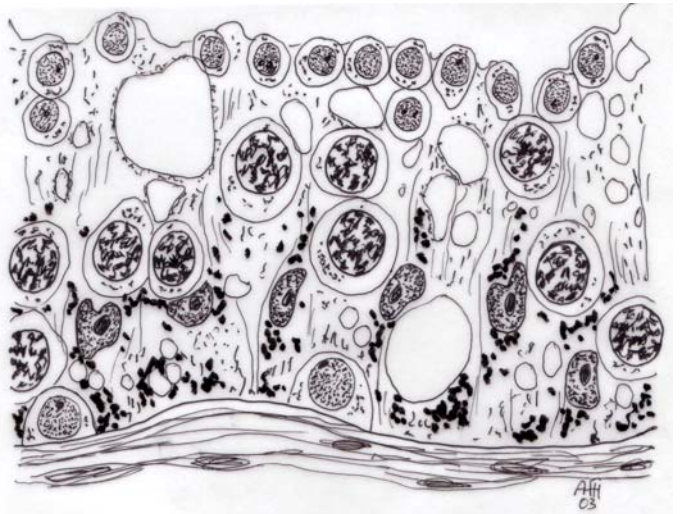

F

Supplement: MOESM4 [file 9566134]
